# Supplementary material for: Role of the Drug Transporter ABCC3 in Breast Cancer Chemoresistance
Source: PubMed Central journal article supplement (PMC4865144; doi:10.1371/journal.pone.0155013), 2016-05-12
Supplement: pone.0155013.s001.pdf [file pone.0155013.s001.pdf]

| Gene name     | Primer sequence                   |
|---------------|-----------------------------------|
| ABCC1-FW      | 5'-AGCCGGTGAAGGTTGTGTAC -3'       |
| ABCC1-RV      | 5'-TGACGAAGCAGATGTGGAAG -3'       |
| ABCC3-FW      | 5'-CCTTTGCCAACTTTCTCTGC -3'       |
| ABCC3-RV      | 5'-AGGGCACTCAGCTGTCTCAT -3'       |
| BMI1-FW       | 5'- CCAGGGCTTTTCAAAAATGA -3'      |
| BMI1-RV       | 5'-CCGATCCAATCTGTTCTGGT -3'       |
| Nanog-FW      | 5'- CCTCCTCCATGGATCTGCTTATTCA -3' |
| Nanog-RV      | 5'-CAGGTCTTACCTGTTTGTAG -3'       |
| Oct-4-FW      | 5'-CGACCATCTGCCGCTTTGAG -3'       |
| Oct-4-RV      | 5'-CCCCCTGTCCCCATTCTA -3'         |
| $\beta$ 2M-FW | 5'-CCTGAATTGCTATGTGTCTGGG-3'      |
| $\beta$ 2M-RV | 5'-TGATGCTGCTTACATGTCTCGA -3'     |
| GAPDH-FW      | 5'-CCACCCATGGCAAATCCATGGCA-3'     |
| GAPDH-RV      | 5'-TCTAGACGGCAGGTCAGGTCCACC-3'    |

**S1 Fig. Primers for Real time PCR experiments:** The sequence of the primers used in the study.
