# Supplementary material for: Role of the Drug Transporter ABCC3 in Breast Cancer Chemoresistance
Source: PubMed Central journal article supplement (PMC4865144; doi:10.1371/journal.pone.0155013), 2016-05-12
Supplement: pone.0155013.s002.pdf [file pone.0155013.s002.pdf]

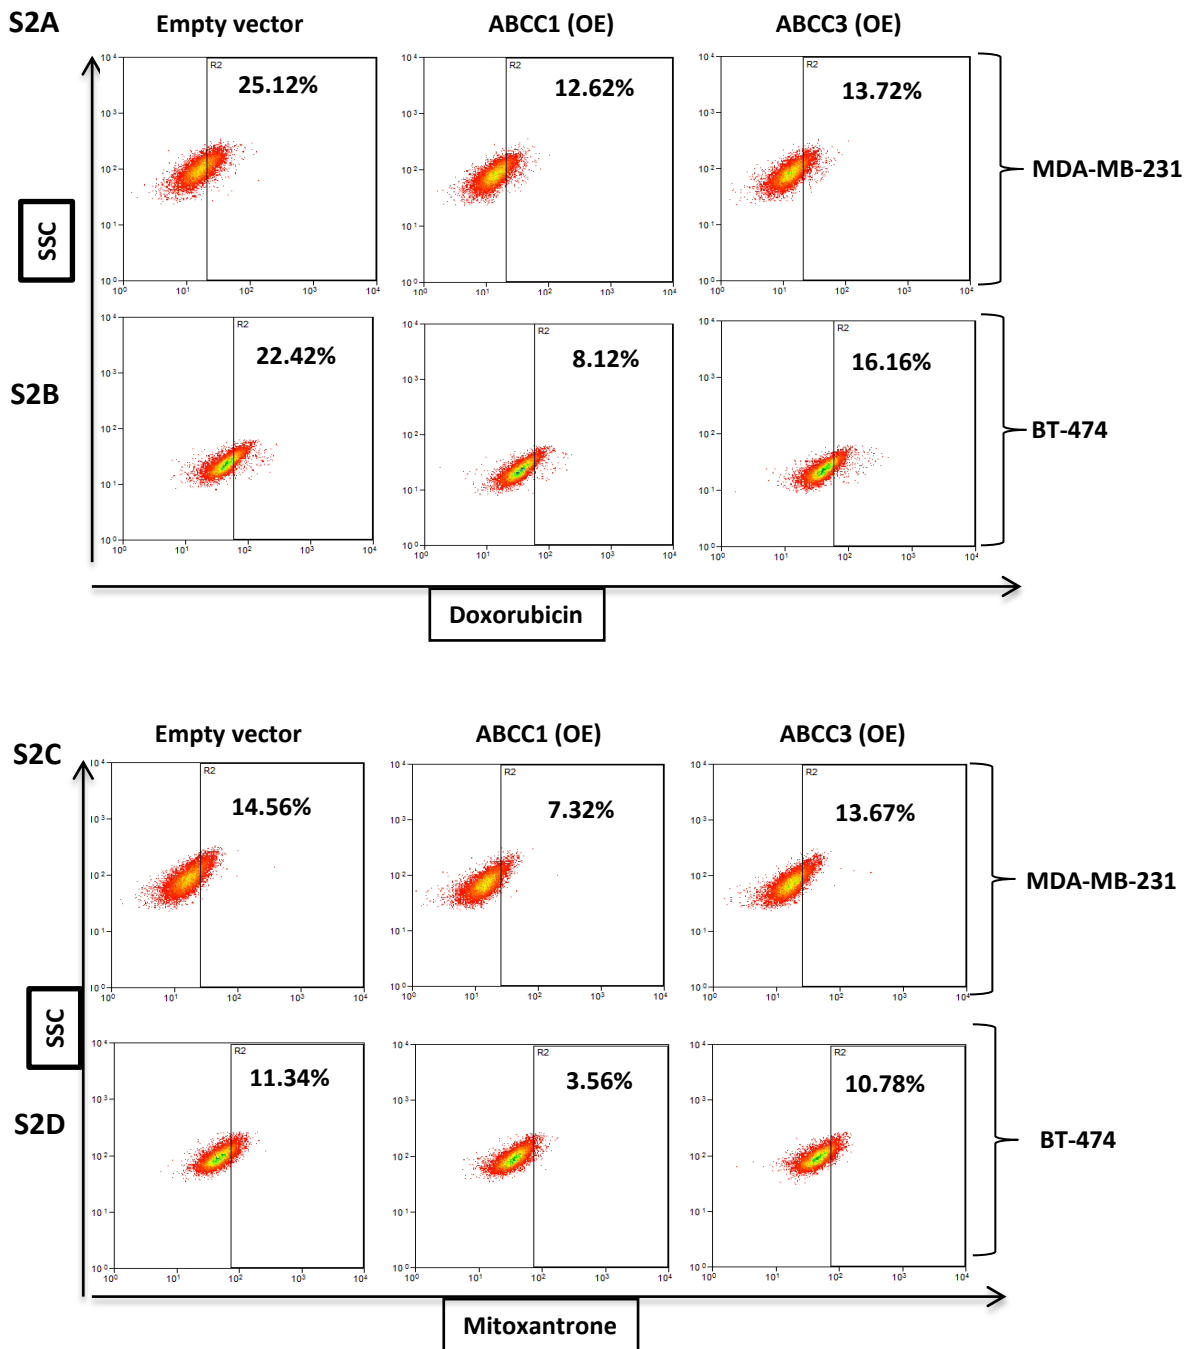

**S2 Fig. Effect of ABCC3 overexpression on chemotherapeutic drug retention:** FACS plots representing the drug retention in MD-AMB-231 (S2A and S2C) and BT-474 cells (S2B and S2D) transiently transfected with empty vector or ABCC1 (OE) or ABCC3 (OE). n=3.
