# Supplementary material for: Role of the Drug Transporter ABCC3 in Breast Cancer Chemoresistance
Source: PubMed Central journal article supplement (PMC4865144; doi:10.1371/journal.pone.0155013), 2016-05-12
Supplement: pone.0155013.s003.pdf [file pone.0155013.s003.pdf]

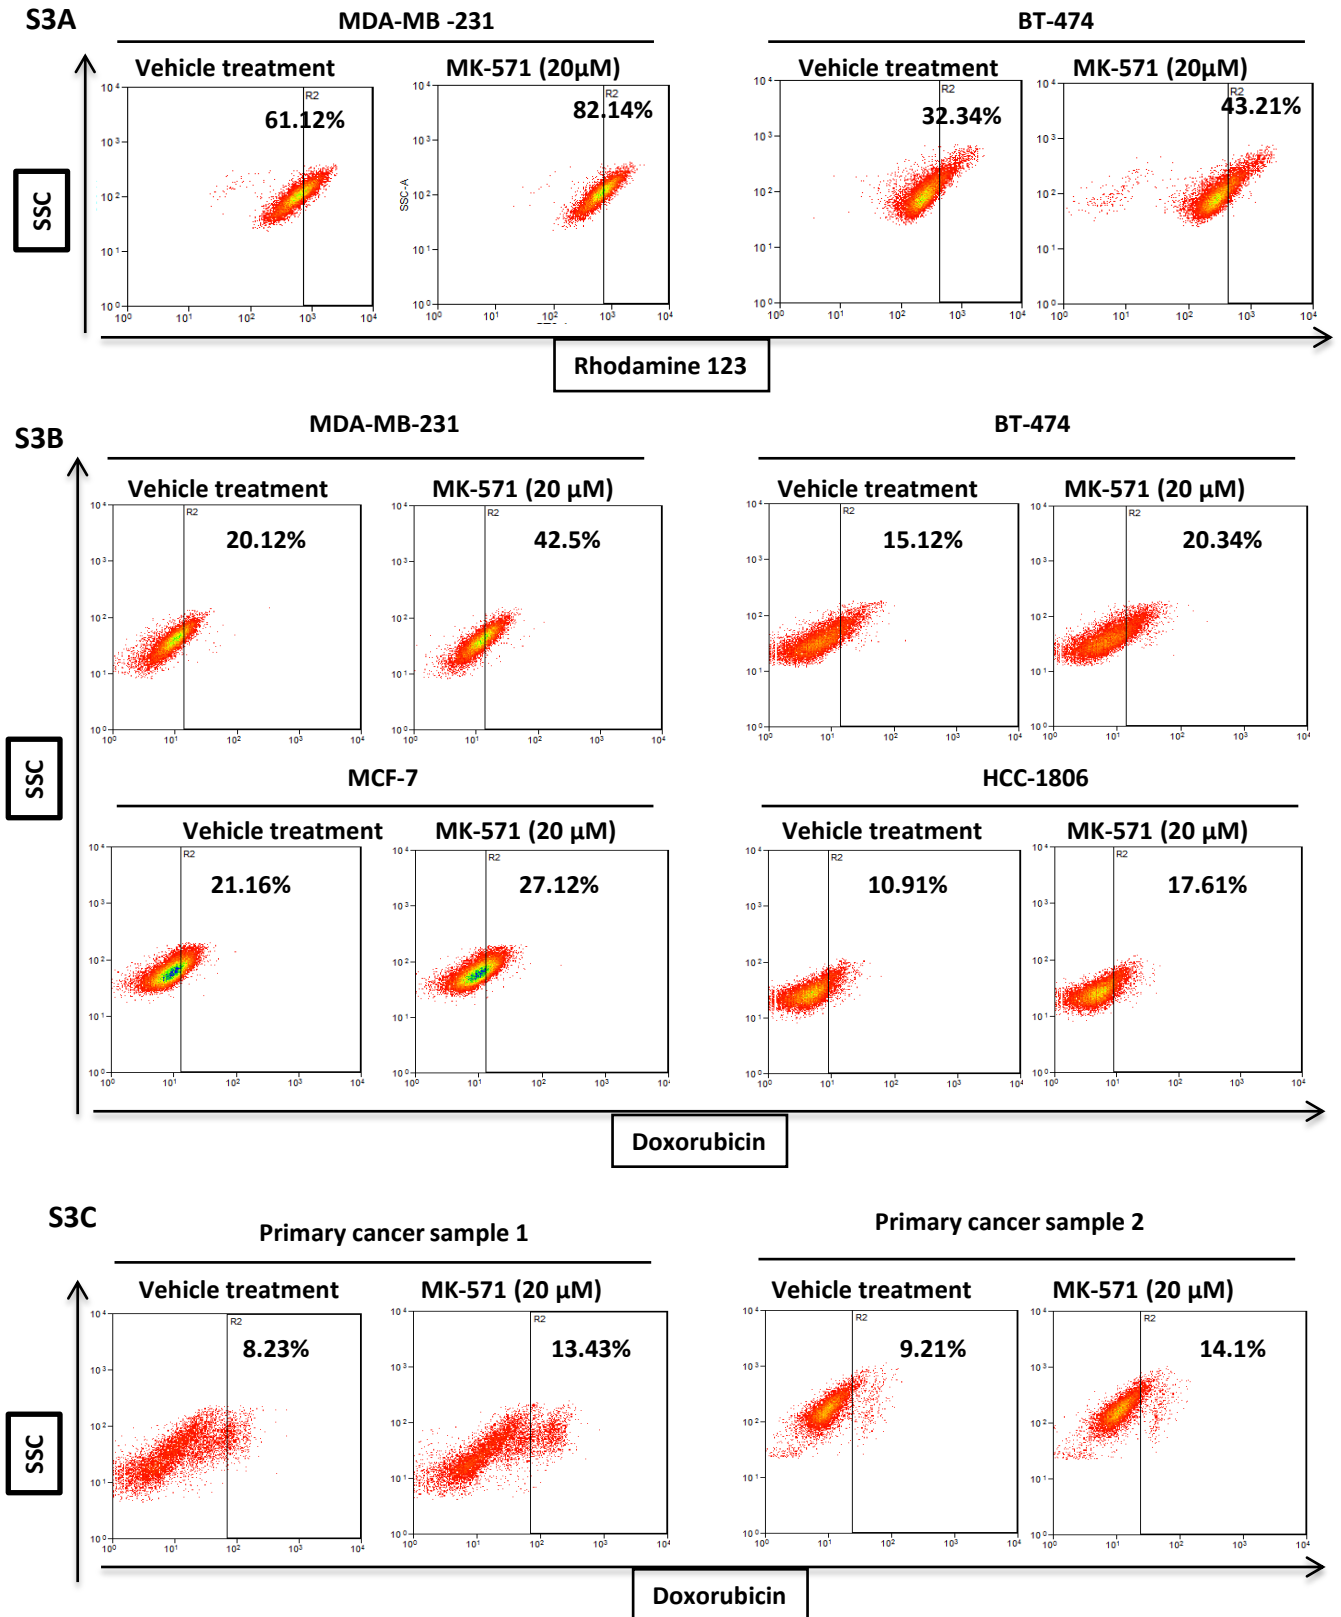

**S3 Fig. Effect of MK-571 on Rhodamine and Doxorubicin retention in breast cancer cells:** FACS plots represents rhodamine-123 retention in MK-571 treated breast-cancer cells (S3A), doxorubicin retention in MK-571 treated breast cancer cells (S3B) and in primary breast cancer cells (S3C). n=3.
