# Supplementary material for: Role of the Drug Transporter ABCC3 in Breast Cancer Chemoresistance
Source: PubMed Central journal article supplement (PMC4865144; doi:10.1371/journal.pone.0155013), 2016-05-12
Supplement: pone.0155013.s004.pdf [file pone.0155013.s004.pdf]

S4A

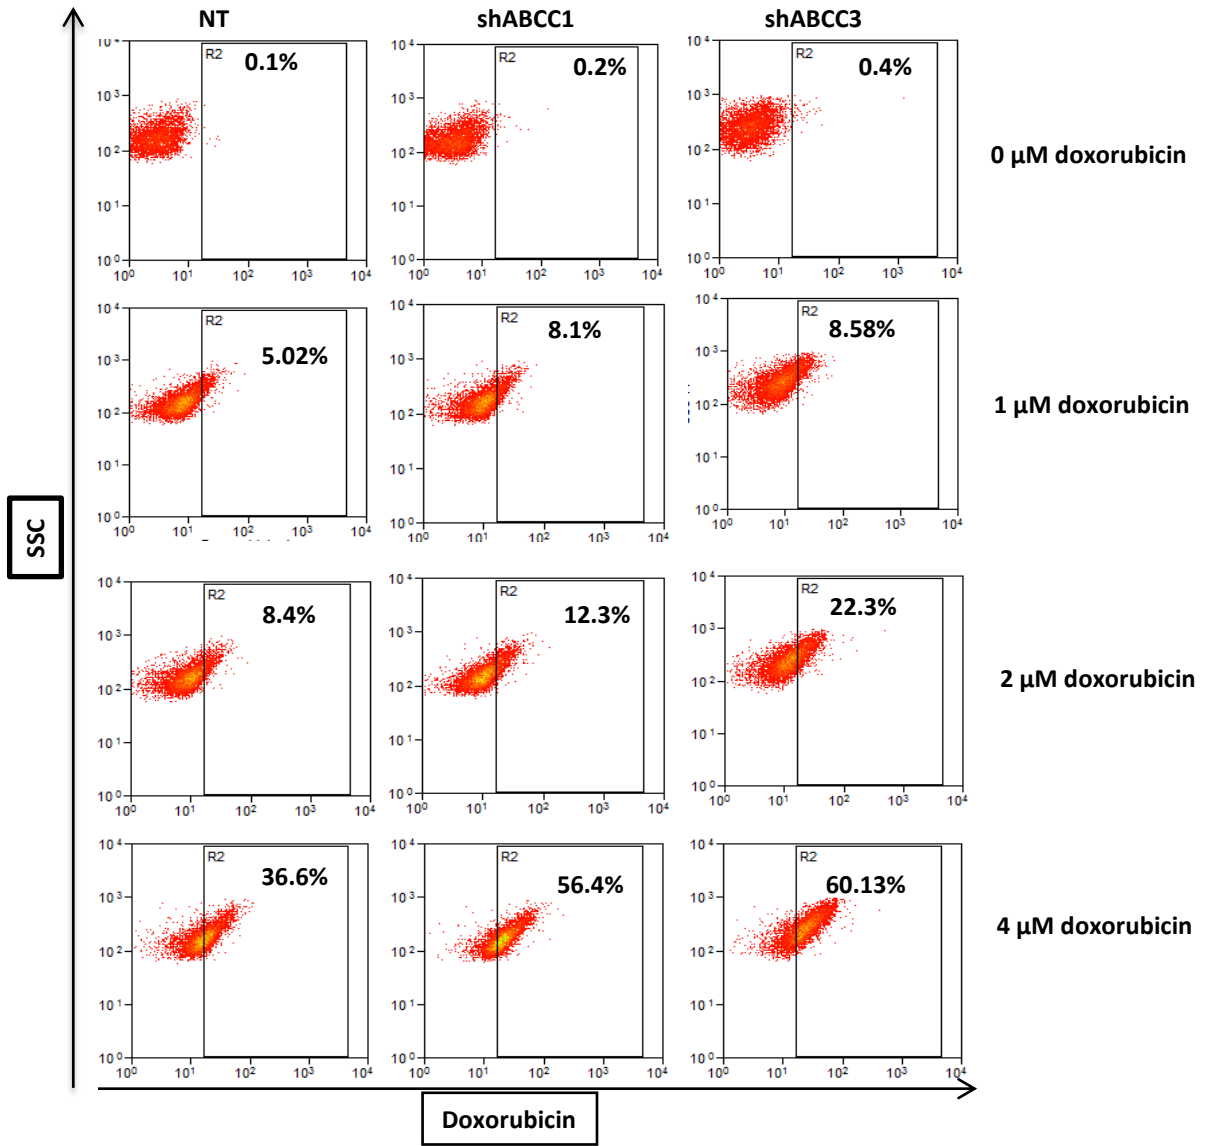

**S4A Fig. Effect of ABCC3 knockdown on doxorubicin retention:** FACS plots shows retention of increasing concentrations of doxorubicin in MDA-MB-231 cells expressing NT or shABCC1 or shABCC3. n=3.
