# Supplementary material for: Role of the Drug Transporter ABCC3 in Breast Cancer Chemoresistance
Source: PubMed Central journal article supplement (PMC4865144; doi:10.1371/journal.pone.0155013), 2016-05-12
Supplement: pone.0155013.s005.pdf [file pone.0155013.s005.pdf]

S5A

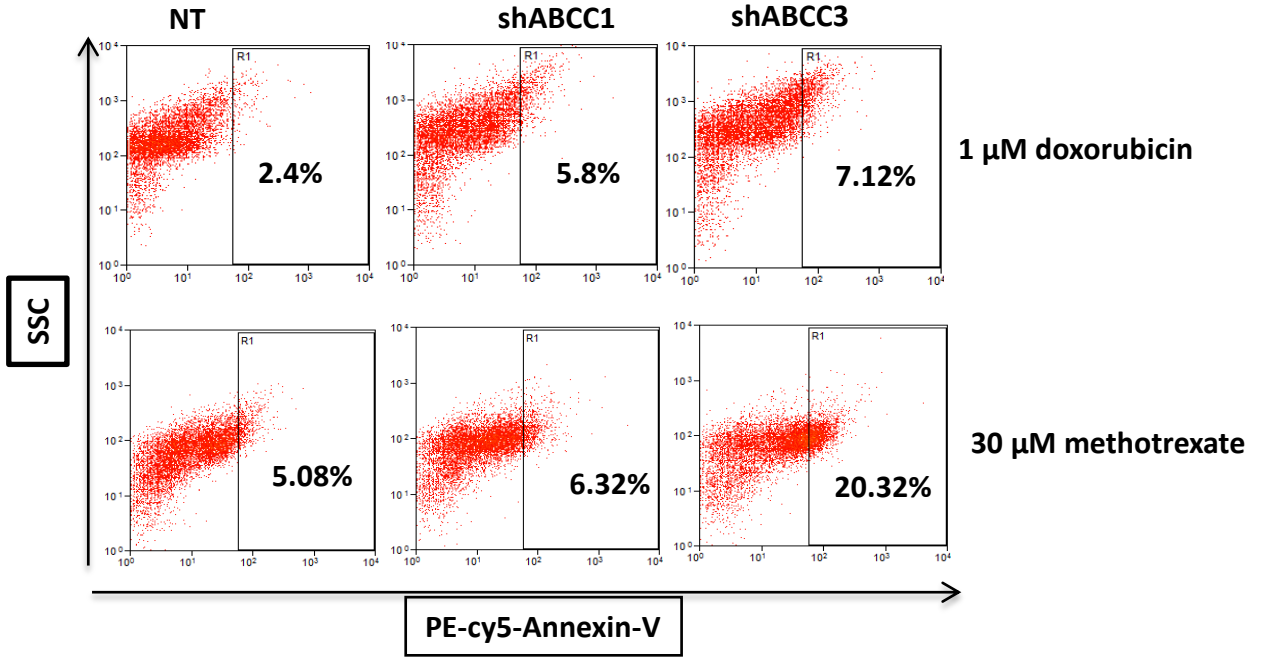

**S5A Fig. Effect of ABCC3 knockdown on drug induced apoptosis:** The FACS plots representing the percentage of Annexin-V-PE-cy5 staining in MDA-MB-231 expressing NT, shABCC1 and shABCC3 cells treated with doxorubicin or methotrexate for 20 hours. n=3.
