# Supplementary material for: Role of the Drug Transporter ABCC3 in Breast Cancer Chemoresistance
Source: PubMed Central journal article supplement (PMC4865144; doi:10.1371/journal.pone.0155013), 2016-05-12
Supplement: pone.0155013.s012.pdf [file pone.0155013.s012.pdf]

**S7 Table. Effect of ABCC3 knockdown on chemosensitivity**

| Cell lines | IC <sub>50</sub> values |                   |                   |
|------------|-------------------------|-------------------|-------------------|
|            | Doxorubicin (μM)        | Mitoxantrone (μM) | Methotrexate (μM) |
| MDA-MB-231 |                         |                   |                   |
| NT         | 0.986 ± 0.08142         | 0.816 ± 0.092     | 24.12 ± 1.042     |
| shABCC1    | 0.601 ± 0.05932         | 0.365 ± 0.0732    | 21.34 ± 0.936     |
| shABCC3    | 0.41 ± 0.0843           | 0.625 ± 0.094     | 13.35 ± 0.731     |

**S7 Table.** Represents the IC<sub>50</sub> values of doxorubicin, mitoxantrone and methotrexate in cells stably expressing non-targeting shRNA or shABCC1 or shABCC3. IC<sub>50</sub> values were determined with curve-fit method using Graph-pad prism 5.
