# Supplementary material for: Role of the Drug Transporter ABCC3 in Breast Cancer Chemoresistance
Source: PubMed Central journal article supplement (PMC4865144; doi:10.1371/journal.pone.0155013), 2016-05-12
Supplement: pone.0155013.s013.pdf [file pone.0155013.s013.pdf]

**S8 Table. Effect of ABCC3 knockdown on tumor inhibition rate**

| Tumors      | Inhibition Rate (%) |
|-------------|---------------------|
| NT          | -                   |
| NT+DOX      | 62.13               |
| shABCC3     | 48.89               |
| shABCC3+DOX | 77.58               |

**S8 Table.** Represents the tumor inhibition rate of tumours formed in NOD SCID mice by MDA-MB-231 cells expressing NT or shABCC3 in the presence or absence of doxorubicin treatment. (PDF)
